# Supplementary material for: Design of the performance outcome scoring template (POS-T) with example application on CO2 emissions reduction amongst 36 OECD member countries
Source: Sci Rep. 2022 Mar 15;12:4404. doi: 10.1038/s41598-022-08368-w (PMC8924175; doi:10.1038/s41598-022-08368-w)
Supplement: Supplementary file 2 — Supplementary Information 2. [file 41598_2022_8368_MOESM2_ESM.xlsx]

## Sheet: Blad1
ID	Item	Achievement_reference	Achievement_sd	n	Achievement_output	Rank_reference	Rank_output
1	Turkey	4.59173	0.179061	10	6.01292	1	5
2	Latvia	4.84294	0.241005	10	5.63451	2	2
3	Chile	4.99311	0.194146	10	6.02377	3	6
4	Mexico	5.47644	0.103424	10	5.7408	4	3
5	Lithuania	6.22819	0.401768	10	6.89171	5	9
6	Switzerland	7.39634	0.0942725	10	5.76319	6	4
7	Hungary	7.3974	0.121572	10	6.21473	7	7
8	Portugal	7.67489	0.567505	10	6.5329	8	8
9	Sweden	7.90263	0.354418	10	5.47474	9	1
10	Spain	9.21208	0.67145	10	7.23344	10	11
11	France	9.44239	0.214816	10	7.23602	11	12
12	Slovakia	9.51028	0.241835	10	7.66145	12	13
13	Italy	9.72283	0.275454	10	7.16498	13	10
14	Slovenia	9.91828	0.263583	10	8.1208	14	15
15	Austria	10.5233	0.497135	10	9.09094	15	18
16	Poland	10.6788	0.62622	10	10.2657	16	21
17	Republic of Korea	10.7115	0.721797	10	13.634	17	29
18	Japan	10.7231	0.140468	10	10.3252	18	22
19	Israel	11.1261	0.297663	5	10.1022	19	20
20	Greece	11.326	0.50391	10	8.94303	20	17
21	Norway	12.2297	0.136088	10	10.4715	21	24
22	United Kingdom	12.23	0.56505	10	7.77375	22	14
23	Germany	12.9702	0.54122	10	11.0921	23	25
24	Estonia	13.5385	0.922525	10	13.7811	24	30
25	Iceland	13.8169	0.497625	10	14.2779	25	31
26	Netherlands	14.0465	0.798819	10	11.5453	26	26
27	Denmark	14.2443	1.42211	10	8.6582	27	16
28	Czechia	14.5149	0.494499	10	12.0529	28	27
29	Belgium	14.5156	0.496489	10	10.3759	29	23
30	Finland	14.6117	0.959243	10	10.0568	30	19
31	Ireland	17.4264	0.54841	10	12.7271	31	28
32	New Zealand	19.7894	0.419248	10	17.597	32	32
33	Canada	23.2406	0.337676	10	20.0405	33	34
34	Luxembourg	24.0628	2.77746	10	18.1652	34	33
35	United States of America	25.2724	0.36406	10	20.6426	35	35
36	Australia	25.3455	0.503121	10	22.3618	36	36
