# Supplementary material for: Design of the performance outcome scoring template (POS-T) with example application on CO2 emissions reduction amongst 36 OECD member countries
Source: Sci Rep. 2022 Mar 15;12:4404. doi: 10.1038/s41598-022-08368-w (PMC8924175; doi:10.1038/s41598-022-08368-w)
Supplement: Supplementary file 3 — Supplementary Information 3. [file 41598_2022_8368_MOESM3_ESM.xlsx]

## Sheet: emission capita 1996-2015
Item	Rank	Referencescore
Turkey	1	4.59173
Latvia	2	4.84294
Chile	3	4.99311
Mexico	4	5.47644
Lithuania	5	6.22819
Switzerland	6	7.39634
Hungary	7	7.3974
Portugal	8	7.67489
Sweden	9	7.90263
Spain	10	9.21208
France	11	9.44239
Slovakia	12	9.51028
Italy	13	9.72283
Slovenia	14	9.91828
Austria	15	10.5233
Poland	16	10.6788
Republic of Korea	17	10.7115
Japan	18	10.7231
Israel	19	11.1261
Greece	20	11.326
Norway	21	12.2297
United Kingdom	22	12.23
Germany	23	12.9702
Estonia	24	13.5385
Iceland	25	13.8169
Netherlands	26	14.0465
Denmark	27	14.2443
Czechia	28	14.5149
Belgium	29	14.5156
Finland	30	14.6117
Ireland	31	17.4264
New Zealand	32	19.7894
Canada	33	23.2406
Luxembourg	34	24.0628
United States of America	35	25.2724
Australia	36	25.3455
